# Supplementary material
Source: publisher figshare collection journal article supplement (https://tandf.figshare.com/articles/dataset/_/3826704)
Supplement: Supplementary file 1 [file 1]

JOURNAL OF VERTEBRATE PALEONTOLOGY

SUPPLEMENTARY DATA 1

Tarsals of Sespedectinae (?Lipotyphla) from the Middle Eocene of Southern California, and the Affinities of Eocene “erinaceomorphs”

TONYA A. PENKROT<sup>\*,1, 2</sup> and SHAWN P. ZACK<sup>2,3</sup>

<sup>1</sup>College of Letters and Sciences, Arizona State University, Phoenix, Arizona, 85004, U.S.A.,  
tpenkrot@asu.edu;

<sup>2</sup>School of Human Evolution and Social Change, Arizona State University, Tempe, Arizona,  
85287, U.S.A.;

<sup>3</sup>Department of Basic Medical Sciences, University of Arizona College of Medicine-Phoenix,  
Phoenix, Arizona, 85004, U.S.A., zack@email.arizona.edu

\*Corresponding author.

## APPENDIX S1. PHYLOGENETIC MATERIALS EXAMINED

**Institutional abbreviations**—**CM**, Carnegie Museum of Natural History, Pittsburgh, Pennsylvania, U.S.A.; **SDSNH**, Department of Paleontology, San Diego Natural History Museum, San Diego, California, U.S.A.; **UCMP**, University of California Museum of Paleontology, Berkeley, California, U.S.A.; **UM**, Museum of Paleontology, University of Michigan, Ann Arbor, Michigan, U.S.A.; **USNM**, United States National Museum of Natural History, Department of Paleobiology, Washington, D.C., U.S.A.; **USNM-M**, United States National Museum of Natural History, Division of Mammals, Washington, D.C., U.S.A.; **YPM-PU**, Princeton University collection, Yale Peabody Museum, Yale University, New Haven, Connecticut, U.S.A..

*Macrocranium*—*M. junnei*: UCMP 216723, 216725, 216728, 216892-4

*Purgatorius*—*P. sp.*: UCMP 197509, 197517; Chester et al. (2015)

Micromomyidae—*Dryomomys szalayi*: Chester et al. (2015)

*Butselia biveri*—Ziegler (2009); Smith and Smith (2012)

*Crypholestes vaughni* (dental only, see text for tarsal specimens): SDSNH 55830, 76809, 76844, 78809; Novacek (1976)

*Proterixoides davisi* (dental only, see text for tarsal specimens): SDSNH 42638, 46634, 46642, 47458, 47459, 47779, 48117, 56165; Walsh (1998)

*Sespedectes* spp.—*S. singularis* (dental only, see text for tarsal specimens): SDSNH 62354, 62570, 62571, 69318, 94740, 94741, 94752; Novacek (1985). *S. stocki*: Novacek (1985)

*Litocherus* spp.—*L. lacunatus*: UCMP 114364, UM 80803, USNM 20931, 21017; Gingerich (1983). *L. notissimus*: AMNH 33936; Simpson (1936). *L. zygeus*: UM 64508, 82026, YPM-PU 21390; Gingerich (1983).

*Patriolestes novaceki*—Walsh (1998).

*Scenopagus* spp.—*S. curticens*: Krishtalka (1976); Gunnell (1998). *S. edenensis*: McGrew (1959); McKenna and Simpson (1959); Krishtalka (1976). *S. priscus*: Krishtalka (1976).

*Solenodon* spp.—*S. cubanus*: USNM-M 49508. *S. paradoxus*: USNM-M 217255, 290520, 364952, 364953, 396963; Wible (2008)

Talpidae—*Talpa europaea*: personal collection, K. D. Rose; O’Leary et al. (2013). *Uropsilus soricipes*: USNM-M 256119, 260743, 574294, 574297, 574298, 574299; Ziegler (1971)

*Zionodon* spp.—*Z. satanus*: CM 71139; Dunn and Rasmussen (2009). *Z. walshi*: CM 71138, 71140-2, 71185, 80624; Dunn and Rasmussen (2009).

## APPENDIX S2. MODIFIED CHARACTERS

**3** Lower incisors: (0) 4, simple structure, similar-sized; (1) 4, first enlarged; (2) 3, simple structure, similar-sized; (3)\* 3 or 2, similar-sized, spatulate; (4) 3 or 2, first enlarged, simple; (5) 3, first two enlarged, simple; (6) first incisor of 3 or 2, or sole if one, enlarged and serrated; (7) 3 or 2, similar-sized, serrated/denticulate; (8) absent; (9) 3, second enlarged.

Revised stepmatrix for character 3:

|   | 0 | 1 | 2 | 3 | 4 | 5 | 6 | 7 | 8 | 9 |
|---|---|---|---|---|---|---|---|---|---|---|
| 0 | - | 1 | 1 | 2 | 2 | 2 | 3 | 2 | 3 | 3 |
| 1 | 1 | - | 2 | 3 | 1 | 2 | 2 | 3 | 4 | 4 |
| 2 | 1 | 2 | - | 1 | 1 | 1 | 2 | 1 | 2 | 2 |
| 3 | 2 | 3 | 1 | - | 2 | 2 | 3 | 2 | 1 | 2 |
| 4 | 2 | 1 | 1 | 2 | - | 1 | 1 | 2 | 3 | 2 |
| 5 | 2 | 2 | 1 | 2 | 1 | - | 2 | 2 | 3 | 2 |
| 6 | 3 | 2 | 2 | 3 | 1 | 2 | - | 1 | 2 | 1 |
| 7 | 2 | 3 | 1 | 2 | 2 | 2 | 1 | - | 1 | 1 |
| 8 | 3 | 4 | 2 | 1 | 3 | 3 | 2 | 1 | - | 3 |
| 9 | 3 | 4 | 2 | 2 | 2 | 2 | 1 | 1 | 3 | - |

**50** Preultimate upper molar ectoflexus: (0) deep on M2, deep on M1; (1) deep on M2 , shallow on M1; (2) shallow on M2 and shallow or absent on M1; (3) absent.

Because the new state added to character 50, is at the beginning of the morphocline, states for all taxa sampled by Hooker are increased by one.

## APPENDIX S3. NEW AND REVISED SCORINGS

For previously included taxa (*Macrocranium*, *Purgatorius*, *Micromomyidae*), revised scorings are indicated by underlining.

### *Macrocranium*

3130121112 1000021003 0011001000 0110101111 0111123202 2120001111  
 0121302011 0101142211 3020112011 ???01100?? ?????0??00 41?????????  
 ??00?????1? 0?0???????? ????0?201?0 ??????101? ??????0??? 1?0?00?1?  
 ?0?11?00?0 ?0???????? ????01100 1011?0?02? ?????????? ?01?0?01?  
 ???201?4? 1?013?200 2112120110 2001103111 1014100112 1001310111  
0200100100

### *Purgatorius*

705???1?10 ???110003 0001100100 2130041021 0111122202 1122010110  
 0112202010 111113???? ?????????? ?????????? ?????????? ??????????  
 ?????????? ?????????? ?????????? ?????????? ?????????? ??????????  
 ?????????? ?????????? ?????????? ?????????? ?????????? ??????????  
 ?????????? ?????????? 2002102[0&1]00 00001120?2 1013011203  
1003210141 ??????????

### *Micromomyidae*

704?331221 3020100001 1011001100 0030040122 0122124202 2122120110  
 0110302010 1001041111 001012?00? ?????????? ??????????0 ??????????  
 ???0??????? ?????????? ?????????? ????????01? ?????????? ??????0???  
 ??????????1 ?????????? ?????????? ??01000?3? ???2????? ???000111  
 0011110110 100011?200 2002102??0 1?2?1120?? ??13011203 00?321?14?  
 ??????0100

### *Butselia biveri*

??90??1?10 30[1&2]0011004 0101111000 0110110000 0110013100 0011020220  
 0002200000 120004???1 ?????????? ?????????? ?????????? ??????????  
 ?????????? ?????????? ?????????? ?????????? ?????????? ??????????  
 ?????????? ?????????? ?????????? ?????????? ?????????? ??????????  
 ?????????? ?????????? 2202120110 20211120?3 1012000021 1001120111  
 ??????????

### *Proterixoides davis*

# APPENDIX 3S. (CONTINUED)

|                |                |            |            |            |            |
|----------------|----------------|------------|------------|------------|------------|
| 3?30[2&3]21112 | 3011020003     | 0011000000 | 0000121111 | 0110017202 | 2120101111 |
| 0011202011     | 01110[3&4]???1 | ?0???????? | ?????????? | ?????????? | ?????????? |
| ??????????     | ??????????     | ?????????? | ?????????? | ?????????? | ?????????? |
| ??????????     | ??????????     | ?????????? | ?????????? | ?????????? | ?????????? |
| ??????????     | ??????????     | ?????????? | 1202110100 | 10411130?1 | 1114400??? |
| 1203110122     | ?102??????     |            |            |            |            |

## *Solenodon*

|            |            |                |            |            |            |
|------------|------------|----------------|------------|------------|------------|
| 4090011220 | 2001020000 | 1001001000     | 0011300100 | 010?000102 | 0011111001 |
| 00?2200?21 | 0110250101 | 4021122[1&2]11 | 1111111010 | 2000011100 |            |
| 6311010111 | 0000000011 | 0011011004     | 21210?0012 | 1120000010 | 1110000100 |
| 1100100211 | 3110000110 | 2011???3?1     | 1112?121?0 | 1012001000 | 1100110000 |
| 1231000111 | ?100100021 | 0000110310     | 1222100110 | 2041112012 | 1014010003 |
| 1203110111 | 0?00111000 |                |            |            |            |

## *Talpidae*

|                |                |                |                        |            |            |
|----------------|----------------|----------------|------------------------|------------|------------|
| 2030221110     | [0&1]???021006 | 0001101???     | ?000011132             | 3100010202 | 3110001021 |
| 0233[2&4]02021 | 2211050301     | 101012?[1&2]21 | 11??111111             | 2011110?00 |            |
| ?1?1031111     | ?1002?0021     | 1001?1???04    | ?11[0&1]02[0&1]1[0&1]2 | 01?01121?2 |            |
| 212?1???00     | ??1???00?      | 00010?12?0     | ?0??11?3??             | ?112?021?0 | 1001000010 |
| 1202110001     | 0113020211     | 1112201012     | 0000130300             | 1122100100 | 00201130?1 |
| 1013120101     | 0201000110     | 0?1201?00      |                        |            |            |

## *Zionodon*

|            |            |            |            |            |            |
|------------|------------|------------|------------|------------|------------|
| ??????1?00 | ?????????? | ??????0000 | 001120???? | 0???0???0? | 4?2??????0 |
| 0??210?012 | 01?122???? | ?????????? | ?????????? | ?????????? | ?????????? |
| ?????????? | ?????????? | ?????????? | ?????????? | ?????????? | ?????????? |
| ?????????? | ?????????? | ?????????? | ?0?????0?? | ?????????? | ???0?????  |
| ?????????? | ?11?03200  | 2012110000 | 2011113112 | 1013110??? | 1001020141 |
| ????11???? |            |            |            |            |            |

## LITERATURE CITED

- Chester, S. G. B., J. I. Bloch, D. M. Boyer, and W. A. Clemens. 2015. Oldest known euarchontan tarsals and affinities of Paleocene *Purgatorius* to Primates. *Proceedings of the National Academy of Sciences* 112:1487–1492.
- Dunn, R. H., and D. T. Rasmussen. 2009. Skeletal morphology of a new genus of Eocene insectivore (Mammalia, Erinaceomorpha) from Utah. *Journal of Mammalogy* 90:321–331.
- Gingerich, P. D. 1983. New Adapisoricidae, Pentacodontidae, and Hyopsodontidae (Mammalia, Insectivora and Condylarthra) from the late Paleocene of Wyoming and Colorado. *Contributions from the Museum of Paleontology, The University of Michigan* 26:227–255.
- Gunnell, G. F. 1998. Mammalian fauna from the lower Bridger Formation (Bridger A, early middle Eocene) of the southern Green River Basin, Wyoming. *Contributions from the Museum of Paleontology, The University of Michigan* 30:83–130.
- Krishtalka, L. 1976. Early Tertiary Adapisoricidae and Erinaceidae (Mammalia, Insectivora) of North America. *Bulletin of Carnegie Museum of Natural History* 1:1–40.
- McGrew, P. O. 1959. The geology and paleontology of the Elk Mountain and Tabernacle Butte area, Wyoming. *Bulletin of the American Museum of Natural History* 117:117–176.
- McKenna, M. C., and G. G. Simpson. 1959. A new insectivore from the middle Eocene of Tabernacle Butte, Wyoming. *American Museum Novitates* 1952:1–12.
- Novacek, M. J. 1976. Insectivora and Proteutheria of the later Eocene (Uintan) of San Diego County, California. *Contributions in Science, Natural History Museum of Los Angeles County* 283:1–52.
- Novacek, M. J. 1985. The Sespedectinae, a new subfamily of hedgehog-like insectivores. *American Museum Novitates* 2822:1–24.
- O’Leary, M. A., J. I. Bloch, J. J. Flynn, T. J. Gaudin, A. Giallombardo, N. P. Giannini, S. L. Goldberg, B. P. Kraatz, Z.-X. Luo, J. Meng, X. Ni, M. J. Novacek, F. A. Perini, Z. S. Randall, G. W. Rougier, E. J. Sargis, M. T. Silcox, N. B. Simmons, M. Spaulding, P. M. Velazco, M. Weskler, J. R. Wible, and A. L. Cirranello. 2013. The placental mammal ancestor and the post-K-Pg radiation of placentals. *Science* 339:662–667.
- Simpson, G. G. 1936. A new fauna from the Fort Union of Montana. *American Museum Novitates* 873:1–27.
- Smith, R., and T. Smith. 2012. The carnivoran-like insectivore *Butselia biveri* Quinet & Misonne, 1965 (Mammalia, Plesiosoricidae) from the lowermost Oligocene of Europe. *Spanish Journal of Palaeontology* 27:105–116.
- Walsh, S. L. 1998. Notes on the anterior dentition and skull of *Proterixoides* (Mammalia: Insectivora: Dormaaliidae), and a new dormaaliid genus from the early Uintan (middle Eocene) of Southern California. *Proceedings of the San Diego Society of Natural History* 34:1–26.
- Wible, J. R. 2008. On the cranial osteology of the Hispaniolan solenodon, *Solenodon paradoxus* Brandt, 1833 (Mammalia, Lipotyphla, Solenodontidae). *Annals of Carnegie Museum* 77:321–402.
- Ziegler, A. C. 1971. Dental homologies and possible relationships of recent Talpidae. *Journal of Mammalogy* 52:50–68.

Ziegler, R. 2009. Plesiosorids from early Oligocene fissure fillings in South Germany, with remarks on plesiosorid phylogeny. *Acta Palaeontologica Polonica* 54:365–371.
